# Supplementary material for: Nature-inspired preparation of self-adhesive, frost-resistant, and ion-conductive hydrogels for flexible strain sensors
Source: Royal Society of Chemistry journal article supplement (doi:10.1039/d2ra03822f), 2022-01-01
Supplement: d2ra03822f1.pdf [file d2ra03822f1.pdf]

Electronic Supplementary Information (ESI) for RSC Advances

This journal is © The Royal Society of Chemistry 2022

## Supporting Information

### **Nature-inspired preparation of self-adhesive, frost-resistant, and ion-conductive hydrogels for flexible strain sensors**

Tiantian Zhang,<sup>a</sup> Lihui Meng,<sup>a</sup> Yanru Hu,<sup>a</sup> Zhiyuan Ouyang,<sup>a</sup> Wenchao Li,<sup>a</sup> Bin Xie,<sup>a</sup>

Fang Zhu,<sup>a</sup> Jiangling Wan<sup>b\*</sup> and Qingzhi Wu<sup>a\*</sup>

<sup>a</sup> State Key Laboratory of Advanced Technology for Materials Synthesis and Processing, and Biomedical Materials and Engineering Centre of Hubei Province, Wuhan University of Technology, Wuhan 430070, P. R. China

<sup>b</sup> College of Life Science and Technology, National Engineering Research Center for Nanomedicine, Huazhong University of Science and Technology, Wuhan 430074, P. R. China

\* Corresponding authors.

\*E-mail address: [wuqzh@whut.edu.cn](mailto:wuqzh@whut.edu.cn) (Q. Z. Wu); [wanj1@hust.edu.cn](mailto:wanj1@hust.edu.cn) (J. L. Wan).

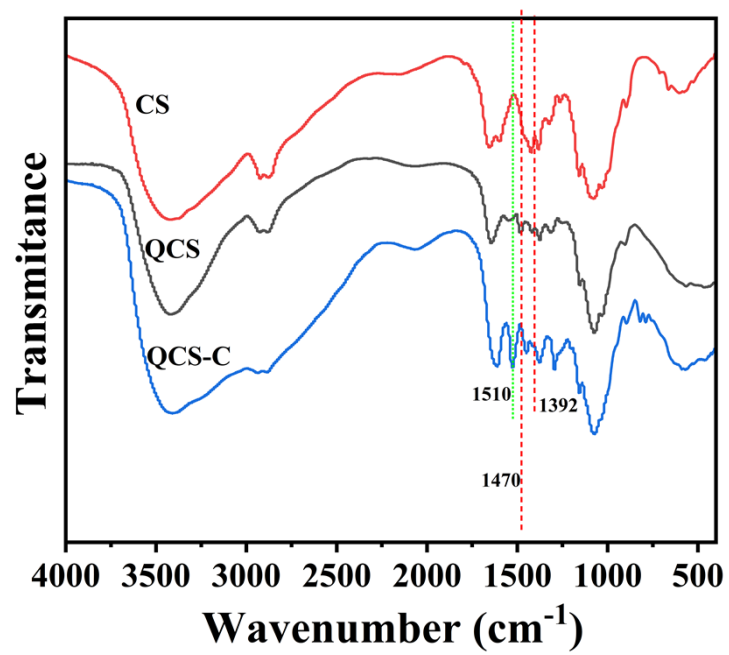

Fig. S1 FT-IR spectra of CS, QCS and QCS-C.

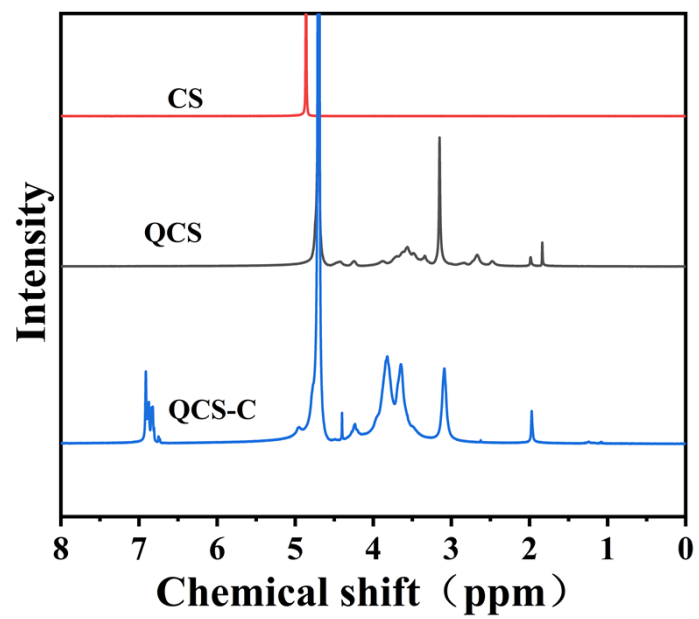

Fig. S2 <sup>1</sup>H-NMR spectra of CS, QCS and QCS-C.

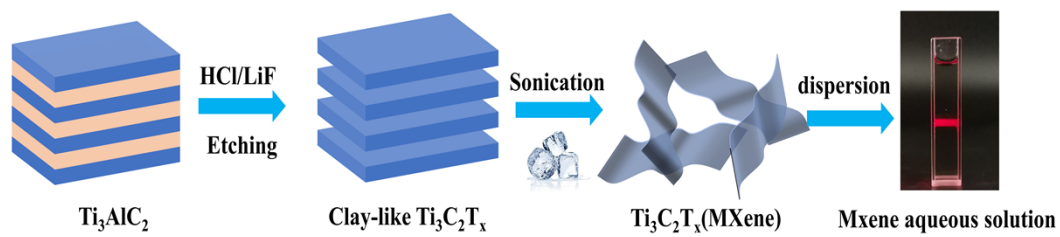

**Fig. S3** Synthesis and dispersion of MXene nanosheets.

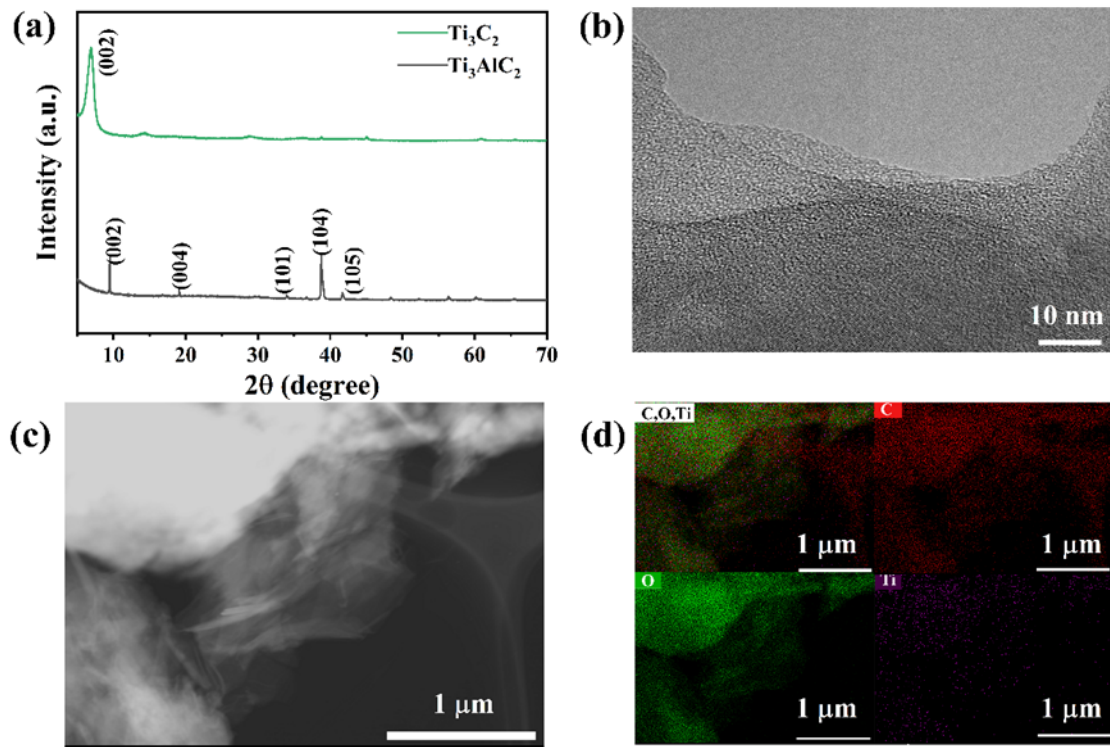

**Fig. S4** (a) XRD patterns of MAX and MXene nanosheets, (b) High resolution TEM image of MXene nanosheets, (c) TEM image of MXene nanosheets, (d) EDS images of (c).

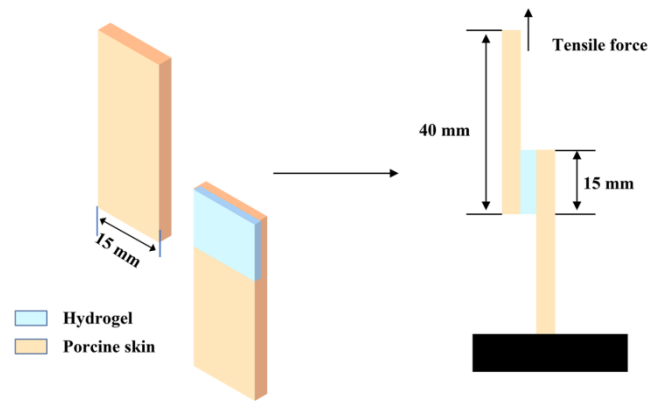

**Fig. S5** Schematic diagram of adhesion experiment (taking porcine skin as an example).

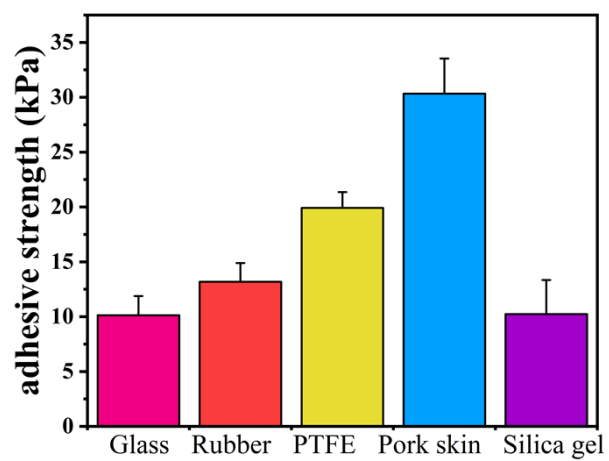

**Fig.S6** Adhesion properties of the hydrogel on the surface of different substrates.

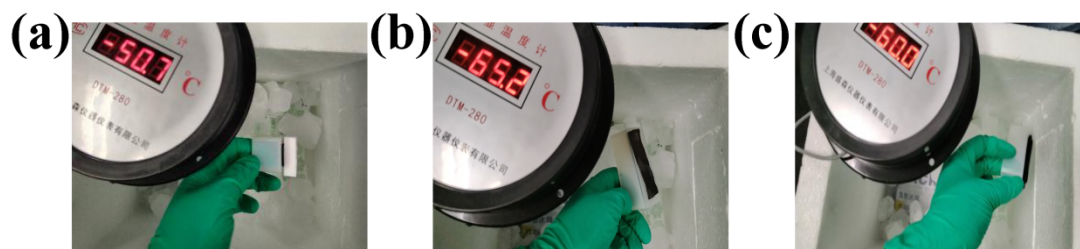

**Fig. S7** Diagram of adhesion performance of the hydrogel in low temperature box. (a) PTFE, (b) glass, (c) rubber.



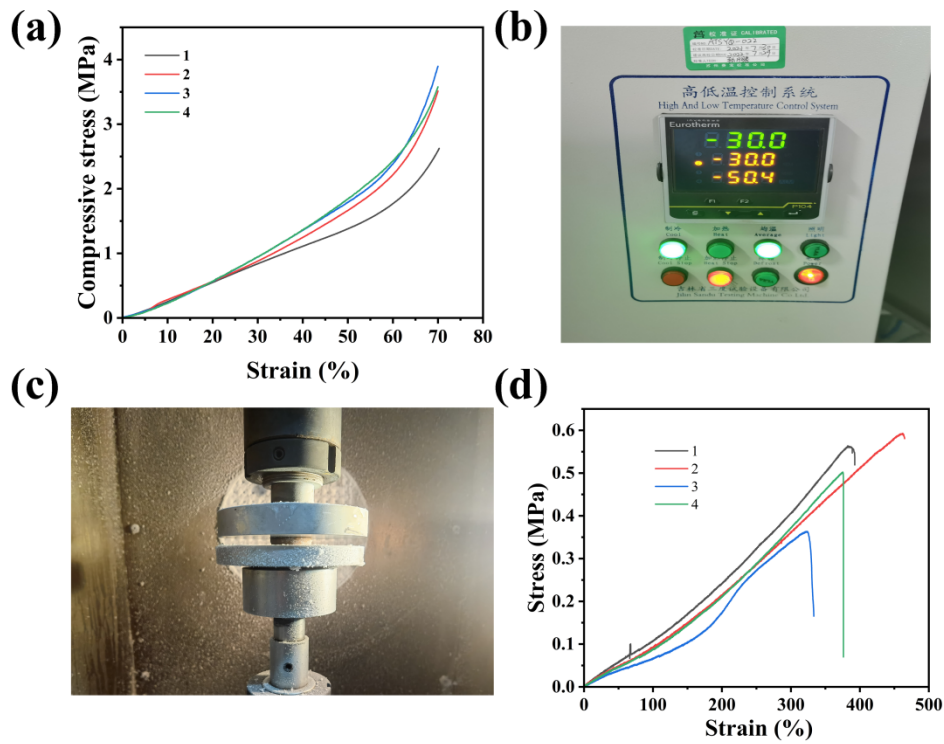

**Fig. S8** Mechanical strength of the hydrogel at low temperature. (a) Compressive strain–stress curves of the hydrogel at  $-30^{\circ}\text{C}$ . (b) Temperature control system. (c) The hydrogel was compressed at  $-30^{\circ}\text{C}$ . (d) The tensile strain–stress curves of the hydrogel at  $-30^{\circ}\text{C}$ .

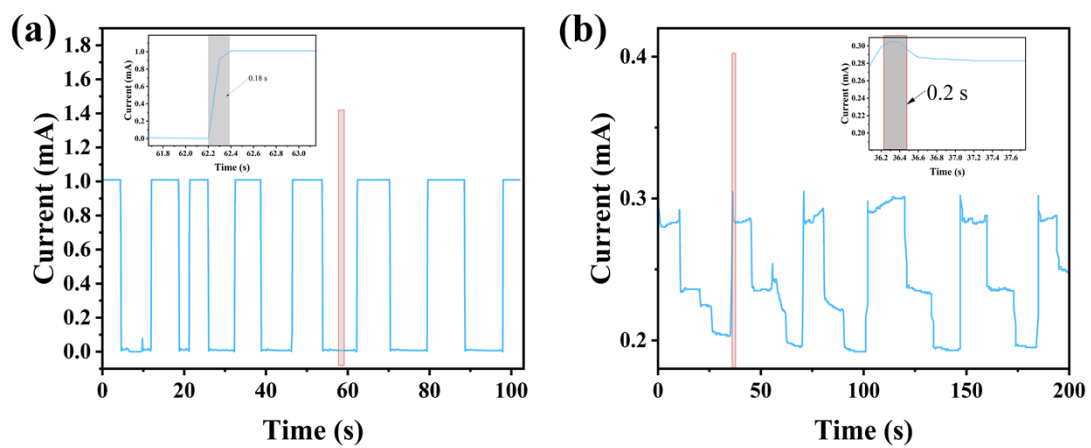

**Fig. S9** (a) Response time at room temperature, (b) Response time at low temperature.

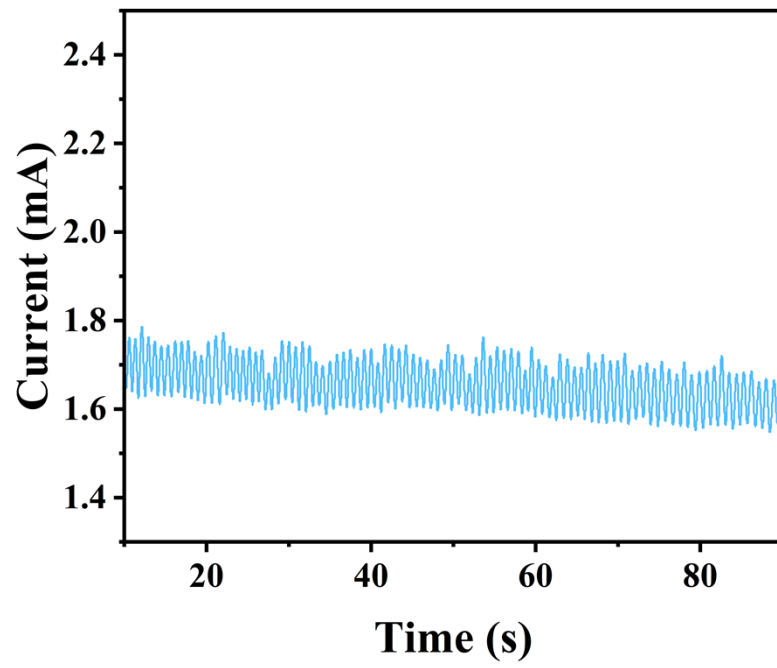

**Fig. S10** Rapid bending of index finger for many times.
